# Supplementary material for: Amyloid β / PKC-dependent alterations in NMDA receptor composition are detected in early stages of Alzheimer´s disease
Source: PubMed Central journal article supplement (PMC8934345; doi:10.1038/s41419-022-04687-y), 2022-03-19

**Figure 1A.**

**$\alpha$ NR2B (~180 KDa)**

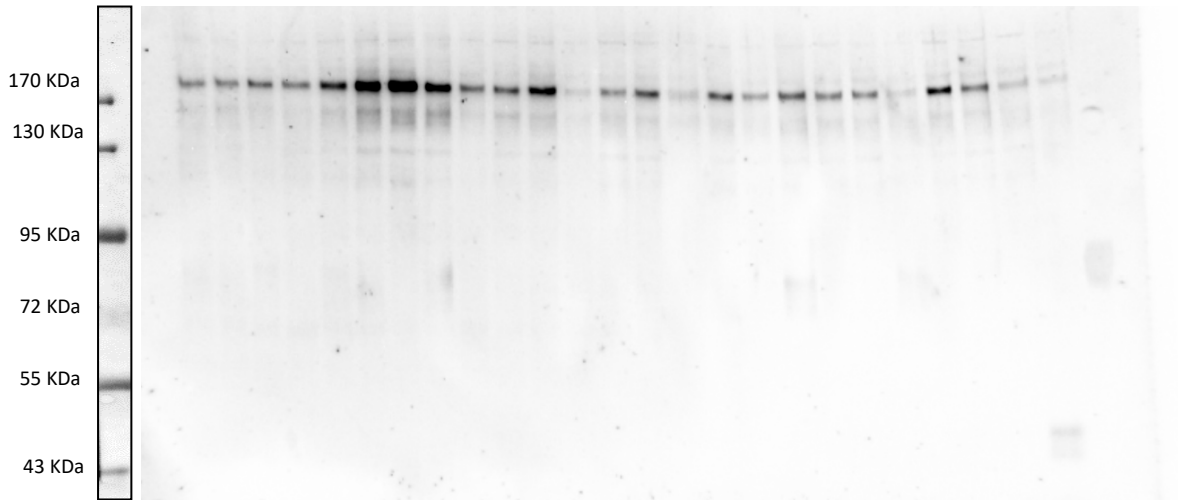

**$\alpha$ PSD95 (~95KDa)**

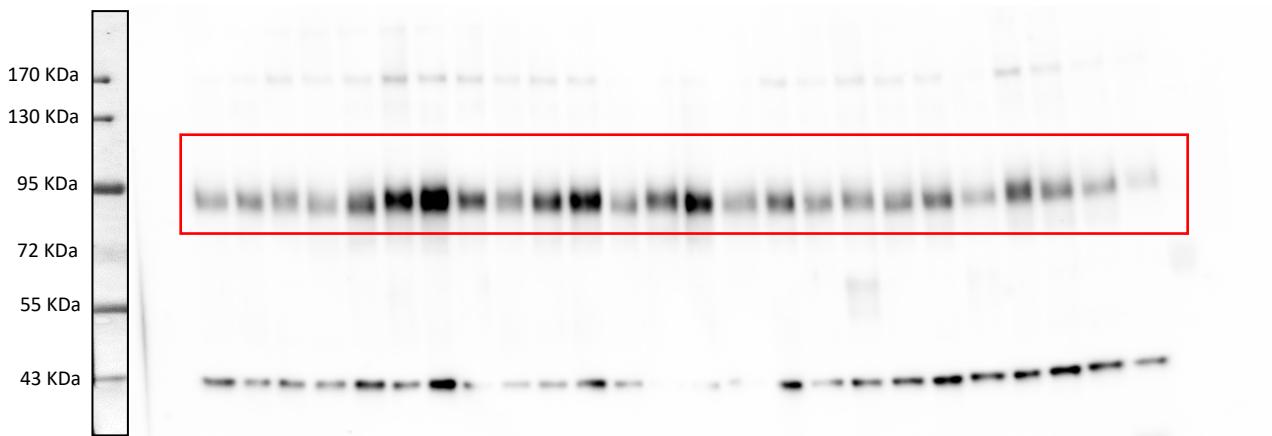

**$\alpha$  $\beta$ -Actin (~42KDa)**

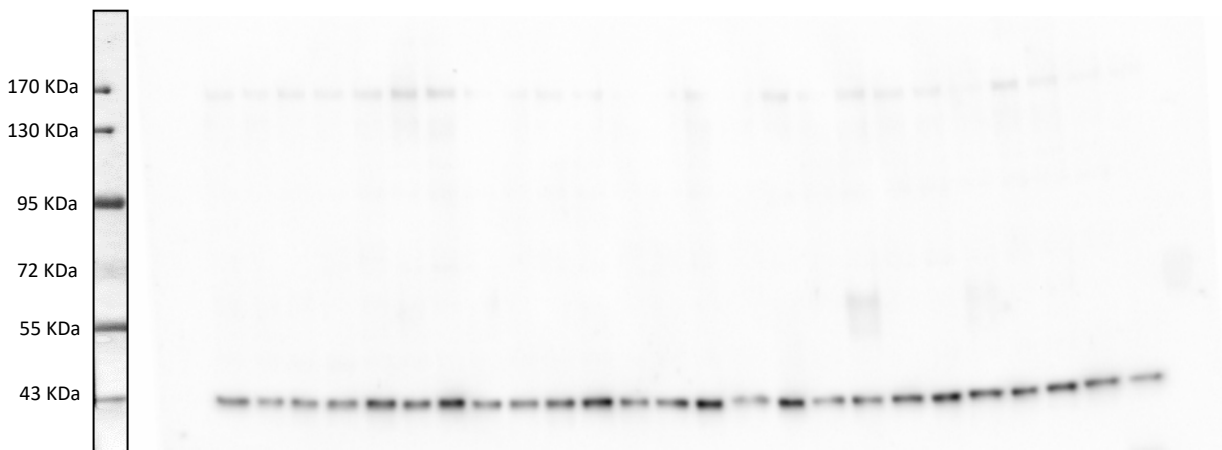

**$\alpha$ Syn** (~ 38KDa)

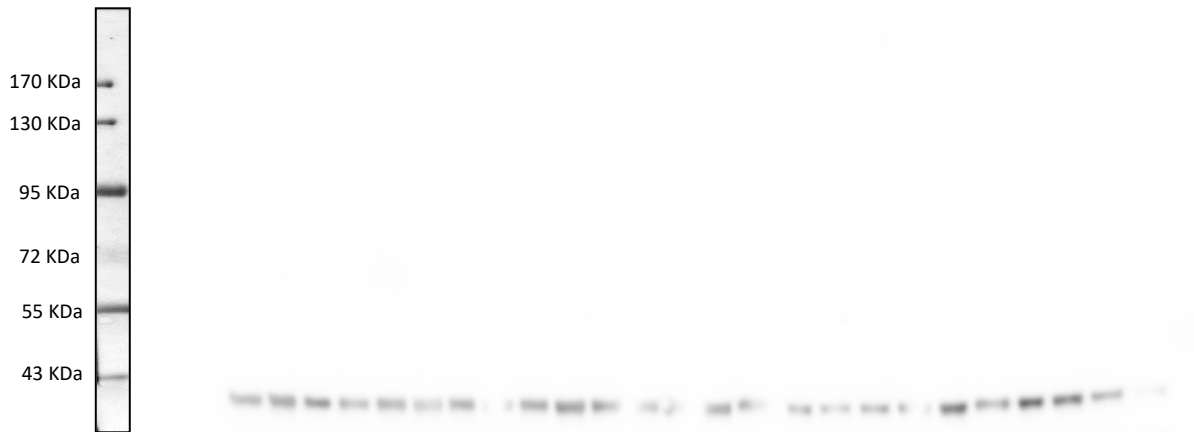

**Figure 2A.**

**$\alpha$ NR2B** (~ 180KDa)

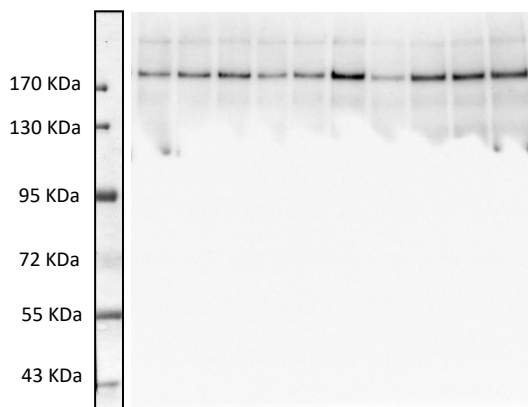

**$\alpha$ PSD95** (~ 95KDa)

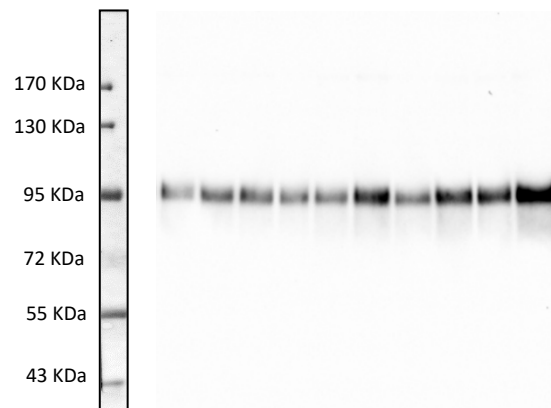

**$\alpha$  $\beta$ -Actin** (~ 42 KDa) and  **$\alpha$ Syn** (~ 38 KDa)

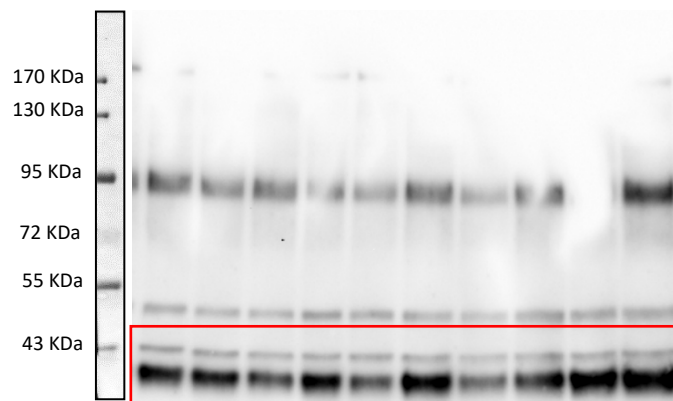

**Figure 3A.**

**$\alpha$ NR2B (~ 180KDa)**

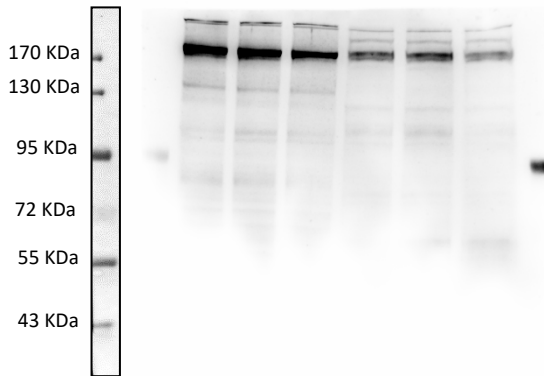

**$\alpha$  $\beta$ -Actin (~ 42 KDa)**

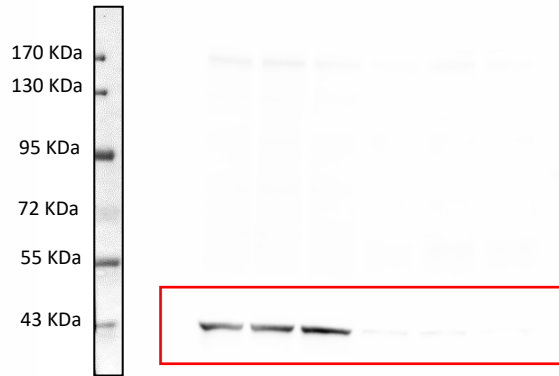

**$\alpha$ NR2A (~ 180KDa)**

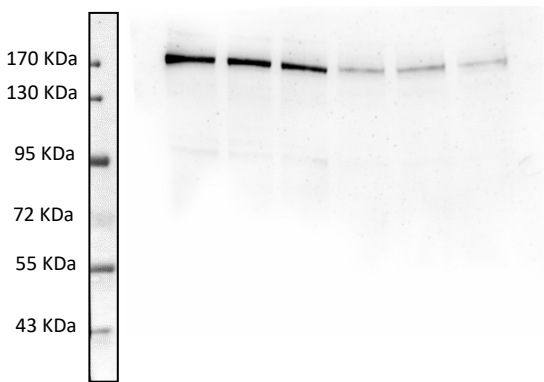

**$\alpha$  $\beta$ -Actin (~ 42 KDa)**

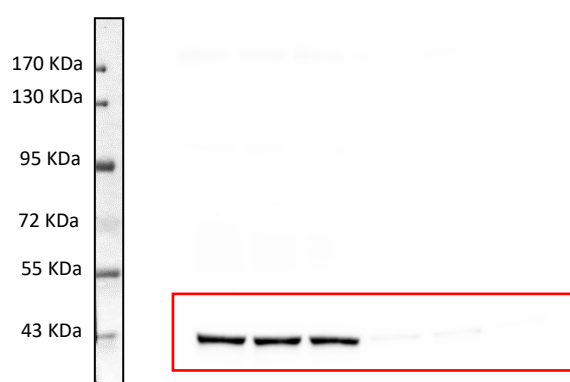

**Figure 4A.**

**$\alpha$ NR2B (~ 180KDa)**

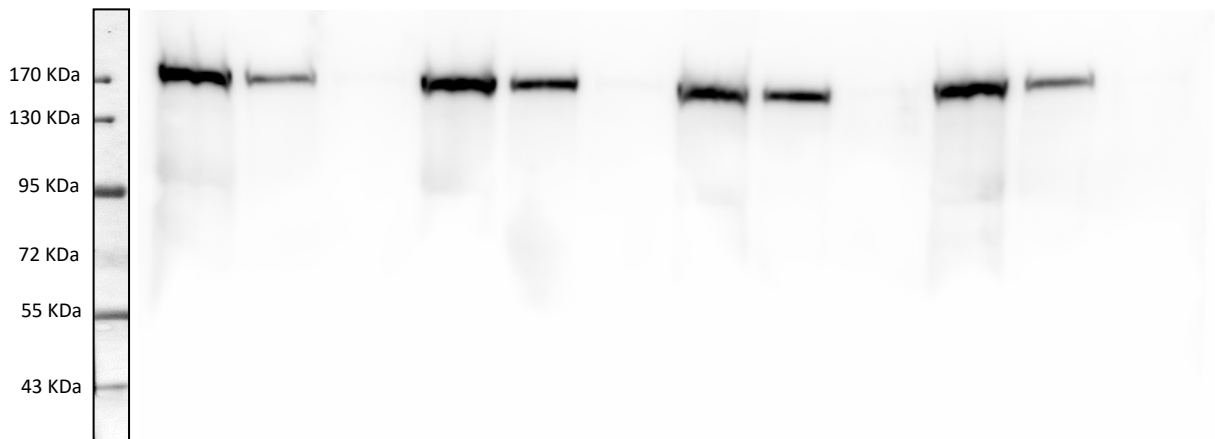

**$\alpha$ PSD95 (~ 95KDa)**

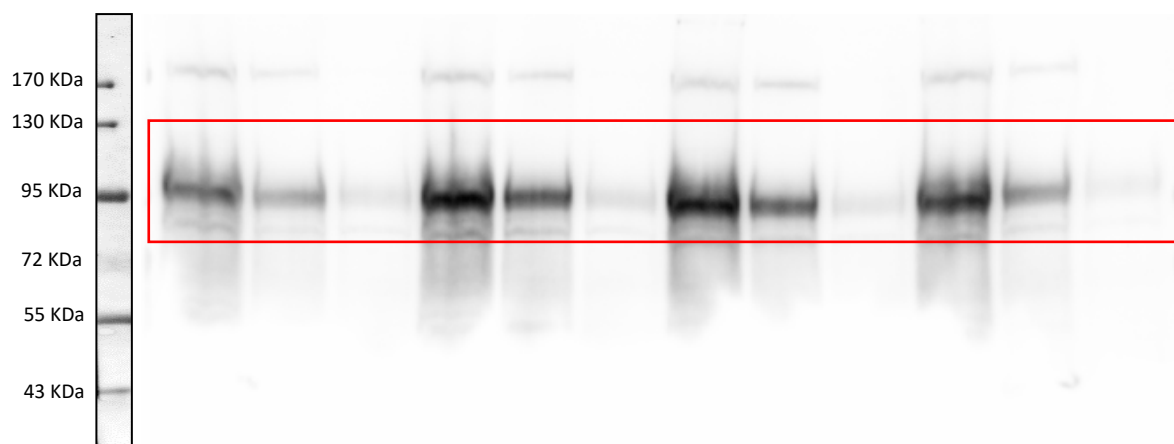

**$\alpha\beta$ -Actin (~ 42KDa)**

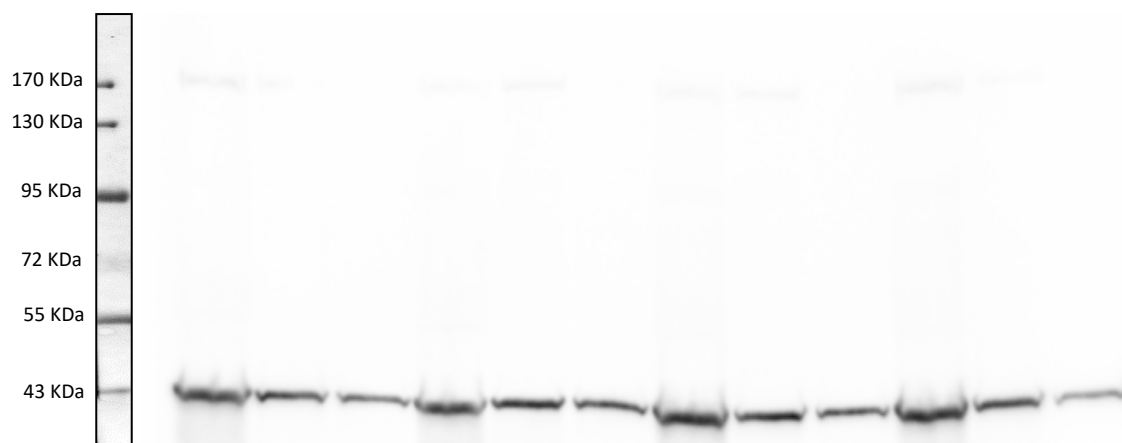

**Figure 5E.**

**$\alpha$ pNR2B (~ 180KDa)**

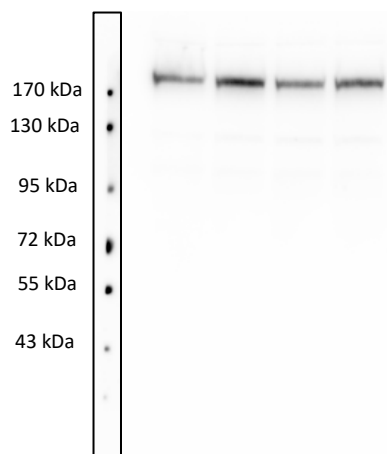

**$\alpha$ NR2B (~ 180KDa)**

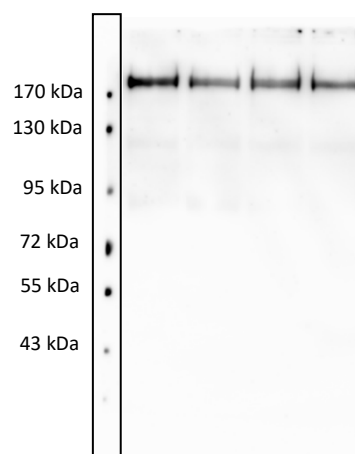

**Figure 5F.**

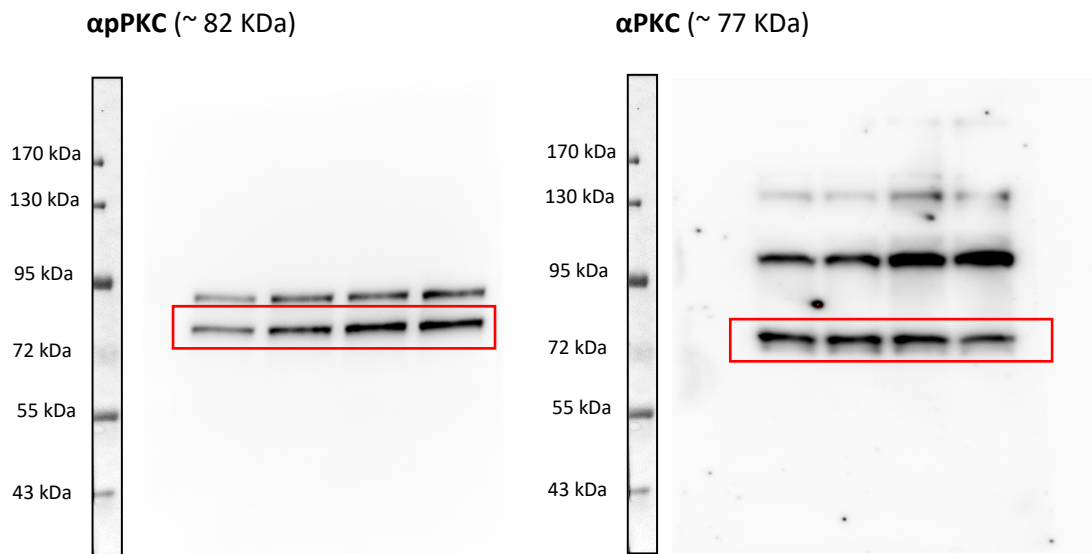

**Figure 5K.**

**αNR2B (~ 180 KDa)**

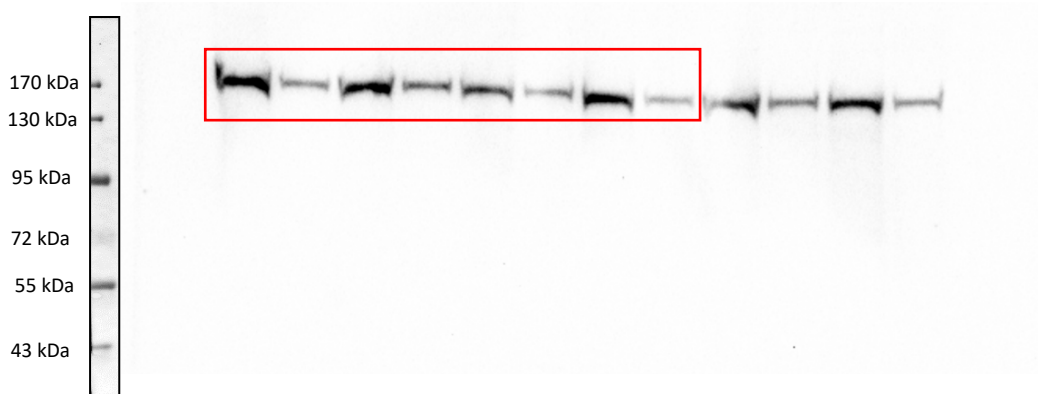

**αβ-Actin (~ 42KDa)**

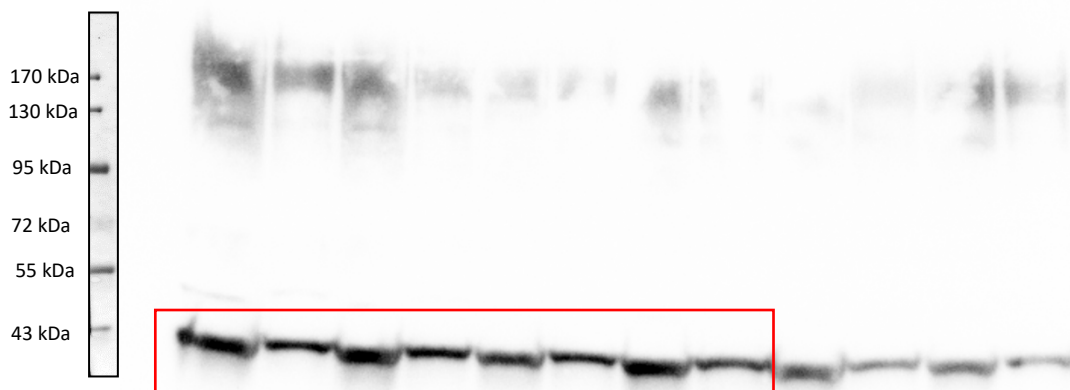

**Figure 6A.**

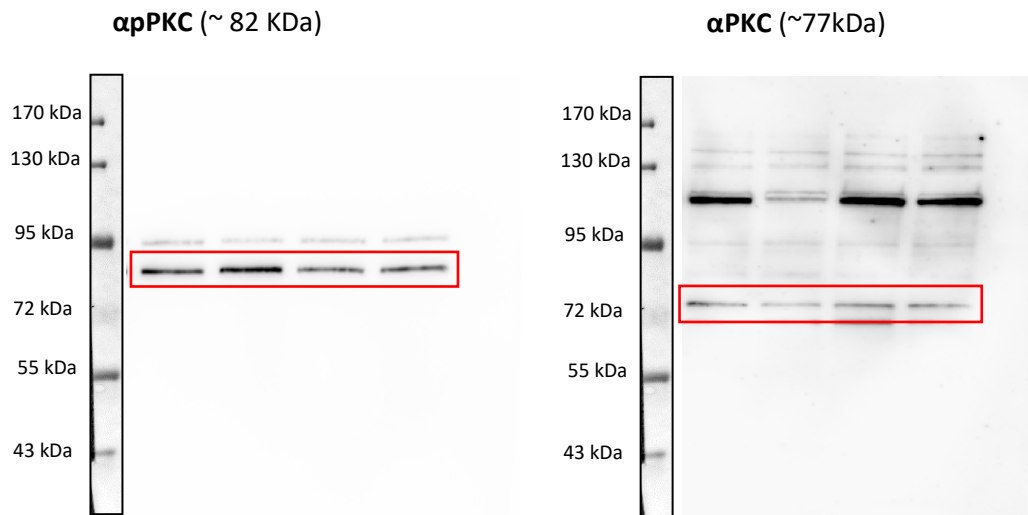

**Figure 6B.**

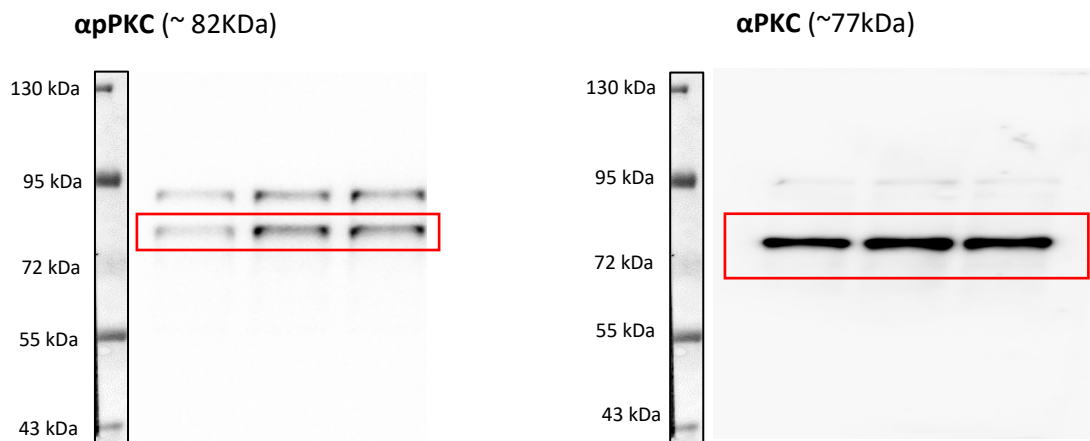

**Figure 6F.**

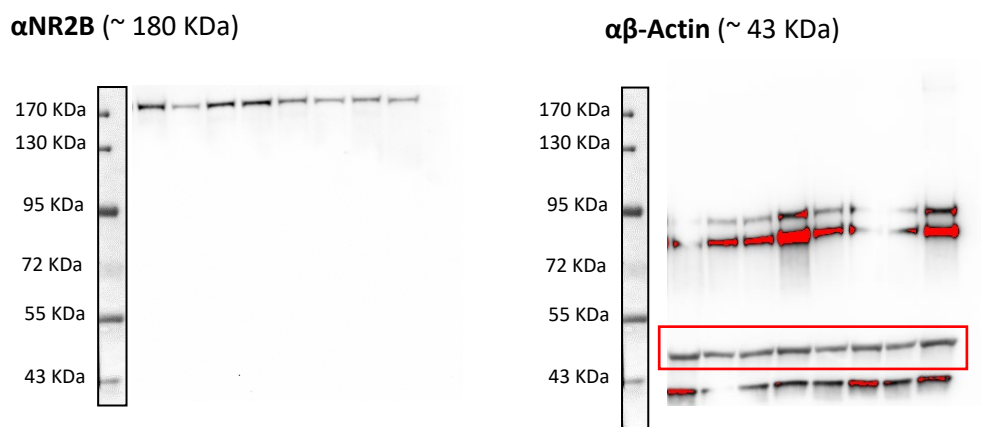

Supplement: 41419_2022_4687_MOESM3_ESM.pdf [file 41419_2022_4687_MOESM3_ESM.pdf]
